# Supplementary material for: Unpacking the Public Health Triad of Social Inequality in Health, Health Literacy, and Quality of Life—A Scoping Review of Research Characteristics
Source: MDPI journal article supplement (doi:10.3390/ijerph21010036), 2023-12-27
Supplement: s1 [file s1]

Supplementary Table S2. Holmen et al. Unpacking the public health triad of social inequality in health, health literacy and quality of life - a scoping review of research characteristics

## Search string from Medline

### OVID Medline

|    |                                                                                                                                                                                                                                                                                                                                                                   |
|----|-------------------------------------------------------------------------------------------------------------------------------------------------------------------------------------------------------------------------------------------------------------------------------------------------------------------------------------------------------------------|
|    |                                                                                                                                                                                                                                                                                                                                                                   |
| 1  | Health Literacy/                                                                                                                                                                                                                                                                                                                                                  |
| 2  | (health adj5 (literac* or literate* or illitera*)).mp.                                                                                                                                                                                                                                                                                                            |
| 3  | ((health adj2 competen*) or (medical adj5 (literac* or literate*)) or (understand* adj4 (medical* or health*) adj2 information)).mp.                                                                                                                                                                                                                              |
| 4  | 1 or 2 or 3                                                                                                                                                                                                                                                                                                                                                       |
| 5  | Quality of Life/                                                                                                                                                                                                                                                                                                                                                  |
| 6  | personal satisfaction/                                                                                                                                                                                                                                                                                                                                            |
| 7  | ((quality adj2 life) or QOL or HRQL or ((life or personal) adj2 satisf*)).mp. [mp=title, abstract, original title, name of substance word, subject heading word, floating sub-heading word, keyword heading word, organism supplementary concept word, protocol supplementary concept word, rare disease supplementary concept word, unique identifier, synonyms] |
| 8  | 5 or 6 or 7                                                                                                                                                                                                                                                                                                                                                       |
| 9  | Social Determinants of Health/                                                                                                                                                                                                                                                                                                                                    |
| 10 | health inequities/ or health status disparities/                                                                                                                                                                                                                                                                                                                  |
| 11 | exp Socioeconomic Factors/                                                                                                                                                                                                                                                                                                                                        |
| 12 | health services accessibility/ or health equity/ or right to health/ or universal health care/ or healthcare disparities/                                                                                                                                                                                                                                         |
| 13 | ((health* adj5 (ineq* or disparit* or equit* or status* or service* access*)) or ((social or structural*) adj3 determinant*) or socioeconomic or economic or SES or poverty or (social adj5 (gradient* or class* or mobility or factor*))).mp.                                                                                                                    |
| 14 | 9 or 10 or 11 or 12 or 13                                                                                                                                                                                                                                                                                                                                         |
| 15 | 4 and 8 and 14                                                                                                                                                                                                                                                                                                                                                    |
