# Supplementary material for: Unpacking the Public Health Triad of Social Inequality in Health, Health Literacy, and Quality of Life—A Scoping Review of Research Characteristics
Source: MDPI journal article supplement (doi:10.3390/ijerph21010036), 2023-12-27
Supplement: s1 [file s1]

Supplementary Table S3. Characteristics of the included citations Holmen et al.

| References,<br>alphabetically                     | Aim of the study                                                                                                                                                                                                                                                              | Methods      |                                                    |                                                | Participants and context                                                                                         |                                      |                               |
|---------------------------------------------------|-------------------------------------------------------------------------------------------------------------------------------------------------------------------------------------------------------------------------------------------------------------------------------|--------------|----------------------------------------------------|------------------------------------------------|------------------------------------------------------------------------------------------------------------------|--------------------------------------|-------------------------------|
|                                                   |                                                                                                                                                                                                                                                                               | Methods      | Study design                                       | Publication type                               | Participants                                                                                                     | Our categorization of the population | Our categorization of context |
| <i>Author, year, country</i>                      | <i>As reported by the authors</i>                                                                                                                                                                                                                                             |              |                                                    |                                                |                                                                                                                  |                                      |                               |
| (Albus, 2018), Germany                            | To comment on a multinational study on the association of health literacy health literacy with sociodemographic characteristics in patients with familial hypercholesterolemia.                                                                                               | NA           | NA                                                 | Orientalational report. Editorial. Full paper. | The general population                                                                                           | General population                   | National/ International       |
| (Alruthia et al., 2020), Saudi Arabia             | To examine the association between the physical, mental, or psychological, social, and environmental domains of health-related quality of life with the patients' trust in their primary care physicians while controlling for several sociodemographic and clinical factors. | Quantitative | Cross-sectional                                    | Full paper                                     | Patients with diabetes                                                                                           | Patients                             | Regional/ District            |
| (Amoah & Phillips, 2018), Ghana                   | To investigate how health literacy may operate in the context of universal health coverage (UHC), especially the role of health literacy in the relationships between elements of UHC such as access to health care and health insurance.                                     | Quantitative | Cross-sectional                                    | Full paper                                     | The general population in rural and urban districts                                                              | Other                                | Regional/ District            |
| (An, Moon, & Cha, 2019), South Korea              | To identify the risk factors and provide data for public health policy in support of Chinese immigrants, this study examined health literacy, depression, and immigrant stress in Chinese immigrants living in South Korea.                                                   | Quantitative | Cross-sectional                                    | Full paper                                     | Chinese immigrants in South Korea                                                                                | Immigrants/minorities                | Community                     |
| (Angner, Miller, Ray, Saag, & Allison, 2010), USA | To explore the relationship between health literacy and happiness while controlling for sociodemographic factors and health status in a community-based sample of older adults.                                                                                               | Quantitative | Cross-sectional                                    | Full paper                                     | Community-dwelling older primary care patients                                                                   | Patients                             | Community                     |
| (Apter et al., 2015), USA                         | To describe how to compare portal training and home visits by a community health worker with an active control of portal training (without home visits). Baseline data of the first participants.                                                                             | Quantitative | Cross-sectional findings and a protocol for an RCT | Protocol, full paper                           | Adult African/American and Hispanic/Latino patients with uncontrolled asthma from low-income urban neighborhoods | Patients                             | Community                     |
| (Apter et al., 2017), USA                         | To describe the planning, design, methodology, challenges, and baseline results of this ongoing randomized controlled trial Helping Asthma Patients 2 (HAP2). Mediators and moderators of the Patient                                                                         | Quantitative | Cross-sectional findings and a protocol for an RCT | Protocol, full paper                           | Low-income asthma patients                                                                                       | Patients/Inpoverted populations      | Regional/ District            |

| References, alphabetically                                         | Aim of the study                                                                                                                                                                                                                                                                                             | Methods      |                       |                                             | Participants and context                                       |                                      |                               |
|--------------------------------------------------------------------|--------------------------------------------------------------------------------------------------------------------------------------------------------------------------------------------------------------------------------------------------------------------------------------------------------------|--------------|-----------------------|---------------------------------------------|----------------------------------------------------------------|--------------------------------------|-------------------------------|
| Author, year, country                                              | As reported by the authors                                                                                                                                                                                                                                                                                   | Methods      | Study design          | Publication type                            | Participants                                                   | Our categorization of the population | Our categorization of context |
|                                                                    | Advocate (PA) asthma outcome relationship are examined along with cost-effectiveness.                                                                                                                                                                                                                        |              |                       |                                             |                                                                |                                      |                               |
| (Asare et al., 2019), USA                                          | To assess cancer patients' and survivors' physical activity behaviors by race/ethnicity.                                                                                                                                                                                                                     | Quantitative | Cross-sectional       | Full paper                                  | Black cancer survivors                                         | Patients/minorities                  | National/ International       |
| (Batista, Lawrence, & Sousa, 2017), Brazil                         | To investigate the association between critical and communicative oral health literacy and oral health outcomes (status, oral health-related quality of life and practices) in adults.                                                                                                                       | Quantitative | Cross-sectional       | Full paper                                  | The adult population in Piracicaba, Brazil                     | General population                   | Regional/ District            |
| (Blancafort Alias et al., 2021), Spain                             | To assess the effectiveness of a group-based intervention to improve self-perceived health as indicator of health inequality.                                                                                                                                                                                | Quantitative | RCT                   | Full paper                                  | Older adults with low self-perceived health                    | Other                                | Community                     |
| (Bragard, Coucke, Petre, Etienne, & Guillaume, 2017), Belgium      | To present health literacy's different dimensions, the difficulties associated with its evaluations, and the development of effective interventions, as well as the many challenges that remain to be met in this field [French].                                                                            | NA           | NA                    | Orientational report. Statement. Full paper | The general Belgian population                                 | General population                   | National/ International       |
| (Clarke & Voss, 2016), Republic of South Africa                    | To determine whether a community-based, multidisciplinary team consisting of home-based caregivers and supervised students could improve the functional status and quality of life of patients living with chronic obstructive pulmonary disease (COPD) in a low-income, peri-urban setting in South Africa. | Quantitative | Pre-posttest          | Full paper                                  | Low-income COPD patients in South Africa                       | Patients/Inpoverted populations      | Community                     |
| (Curtis, Wolf, Weiss, & Grammer, 2012), USA                        | To examine the independent contributions of socioeconomic status and health literacy in explaining asthma disparities.                                                                                                                                                                                       | Quantitative | Cohort                | Full paper                                  | Adult patients (18-40 years) with persistent asthma in Chicago | Patients                             | Regional/ District            |
| (de Vries, Buitrago, Quitian, Wiesner, & Castillo, 2018), Colombia | To present the most currently available data on real access to high quality diagnostic and curative and palliative care in Colombia, a middle-income country with relatively recent large healthcare reforms.                                                                                                | NA           | NA                    | Orientational report. Full paper.           | Cancer patients in general                                     | Patients                             | Regional/ District            |
| (Durand et al., 2021), USA                                         | To understand how to support women across socioeconomic strata in making breast cancer surgery choices.                                                                                                                                                                                                      | Quantitative | RCT                   | Full paper                                  | Women undergoing breast cancer surgery                         | Patients                             | Regional/ District            |
| (Ernsting et al., 2017), Germany                                   | To explore the extent of smartphone and health app use, sociodemographic, medical, and behavioral correlates of smartphone and health app use, and                                                                                                                                                           | Quantitative | Cross-sectional study | Full paper                                  | The general adult German population                            | General population                   | National/ International       |

| References, alphabetically                                      | Aim of the study                                                                                                                                                                                                                                                                                           | Methods        |                                 |                                                        | Participants and context                                 |                                             |                                      |
|-----------------------------------------------------------------|------------------------------------------------------------------------------------------------------------------------------------------------------------------------------------------------------------------------------------------------------------------------------------------------------------|----------------|---------------------------------|--------------------------------------------------------|----------------------------------------------------------|---------------------------------------------|--------------------------------------|
| <i>Author, year, country</i>                                    | <i>As reported by the authors</i>                                                                                                                                                                                                                                                                          | <i>Methods</i> | <i>Study design</i>             | <i>Publication type</i>                                | <i>Participants</i>                                      | <i>Our categorization of the population</i> | <i>Our categorization of context</i> |
|                                                                 | associations of the use of apps and app characteristics with actual health behaviors.                                                                                                                                                                                                                      |                |                                 |                                                        |                                                          |                                             |                                      |
| (Faruqi, Stocks, Spooner, el Haddad, & Harris, 2015), Australia | To evaluate the implementation and effectiveness of using practice nurses in the role of ‘prevention navigators’ to support obese patients with low health literacy to better manage their weight.                                                                                                         | Quantitative   | Protocol for intervention       | Protocol, full paper                                   | Patients with obesity                                    | Patients                                    | Community                            |
| (Fung et al., 2016), China                                      | To investigate, analyze and evaluate the effect of the Health Empowerment Program on the health, health-related quality of life, lifestyle, and health-seeking behaviors among working poor families.                                                                                                      | Quantitative   | Protocol for prospective cohort | Protocol, full paper                                   | Poor working families with small children in China       | Inpoverted populations                      | Community                            |
| (Ghisi, Chaves, Britto, & Oh, 2018), Canada                     | To identify health literacy screening instruments available to coronary artery disease patients; describe the prevalence of low health literacy; explore the predictors of low health literacy; and identify the association between health literacy, health behaviors, and outcomes among these patients. | Review         | Review                          | Full paper                                             | Patients with coronary artery disease                    | Patients                                    | Community                            |
| (Gibbs, Guarnieri, Chu, Murdoch, & Asif, 2021), USA             | Conceptualize a systematic approach of the development of a tailored integrated community and care team to develop a partnership in assisting senior adults with multiple chronic conditions                                                                                                               | Review         | Review                          | Full paper                                             | Vulnerable older adults with multiple chronic conditions | Patients                                    | Community                            |
| (Goss et al., 2021), Ireland                                    | To explore the perceptions of socially disadvantaged Irish adolescents in relation to health literacy and related behaviors and utilize these data to develop relevant vignettes.                                                                                                                          | Mixed methods  | Convergent mixed methods        | Full paper                                             | Disadvantaged adolescents                                | Inpoverted populations                      | Community                            |
| (Graham et al., 2021), USA                                      | To examine the effect of patient-reported quality of life and psychosocial determinants of health on unplanned hospital readmissions in a surgical population.                                                                                                                                             | Quantitative   | Prospective cohort              | Full paper                                             | Veterans undergoing elective inpatient surgery           | Patients                                    | Regional/<br>District                |
| (Griech & Skrzat, 2020), USA                                    | To discuss health literacy and its intersectional relationship with the Social Determinants of Health in patients with cardiovascular disease and to present recommendations for physical therapists to reduce health inequities related to limited health literacy.                                       | NA             | NA                              | Orientational report. Clinical perspective. Full paper | Patients with cardiovascular disease                     | Patients                                    | Regional /<br>District               |
| (Guhl et al., 2019), USA                                        | To examine the association between income and health-related quality of life in a cohort with prevalent atrial fibrillation.                                                                                                                                                                               | Quantitative   | Cohort                          | Full paper                                             | Patient with atrial fibrillation                         | Patients                                    | Regional/<br>District                |

| References, alphabetically                               | Aim of the study                                                                                                                                                                                                                                                                                                                                | Methods      |                          |                               | Participants and context                                                              |                                                  |                               |
|----------------------------------------------------------|-------------------------------------------------------------------------------------------------------------------------------------------------------------------------------------------------------------------------------------------------------------------------------------------------------------------------------------------------|--------------|--------------------------|-------------------------------|---------------------------------------------------------------------------------------|--------------------------------------------------|-------------------------------|
|                                                          |                                                                                                                                                                                                                                                                                                                                                 | Methods      | Study design             | Publication type              | Participants                                                                          | Our categorization of the population             | Our categorization of context |
| (Hardgraves, Henry, & Patton, 2021), USA                 | To describe attitudes, expectations, knowledge, and intentions related to oral health issues from the experiences of older adults living independently in a largely rural south-central state.                                                                                                                                                  | Qualitative  | Interview                | Full paper                    | Older adults                                                                          | Other                                            | Community                     |
| (Harsch et al., 2021), Afghanistan                       | To analyze the relationship between health literacy, quality of life and spiritual and religious beliefs.                                                                                                                                                                                                                                       | Quantitative | Cross-sectional          | Full paper                    | The general population of Gahnzi in Afghanistan                                       | General population                               | Community                     |
| (Hickey et al., 2018), USA                               | To evaluate the racial and ethnic differences in health literacy and coexisting self-reported quality of life in an older adult, ethnically diverse, disadvantaged population with chronic comorbidities.                                                                                                                                       | Quantitative | Cross-sectional study    | Conference abstract, protocol | Older adults, ethnically diverse, disadvantaged population with chronic comorbidities | Patients                                         | Community                     |
| (Irwin, 2018), USA                                       | To address the vulnerabilities experienced by patients with serious mental illness and cancer from disadvantaged communities by developing a targeted collaborative care intervention.                                                                                                                                                          | Quantitative | Intervention development | Conference abstract           | Individuals with serious mental illness and cancer                                    | Patients                                         | Regional / District           |
| (Jamieson, Divaris, Parker, & Lee, 2013), Australia/ USA | To compare oral health literacy levels between two profoundly disadvantaged groups, Indigenous Australians, and American Indians, and to explore differences in sociodemographic, dental service utilization, self-reported oral health indicators, and oral health-related quality of life correlates of oral health literacy among the above. | Quantitative | Cross-sectional          | Full paper                    | Indigenous Australian and American Indians                                            | Immigrants/minorities                            | Regional/ District            |
| (Johnson et al., 2015), Australia                        | To report on selected baseline clinical and socioeconomic data from this cluster randomized study aiming to deliver a program of integrated community-based intensive chronic disease management for Indigenous people in remote communities in Australia.                                                                                      | Quantitative | Cross-sectional          | Full paper                    | Indigenous Australian adults with diabetes                                            | Patients/Immigrants/minorities                   | Community                     |
| (Katzmarzyk et al., 2018), USA                           | To test the effectiveness of a pragmatic, high-intensity lifestyle-based obesity treatment program delivered within primary care among an underserved population.                                                                                                                                                                               | Quantitative | RCT                      | Full paper                    | Low income African Americans who are overweight                                       | Inpoverted populations and immigrants/minorities | Community                     |
| (Kim et al., 1999), USA                                  | To present baseline of Veterans Administrations (VA) Cancer of the Prostate Outcomes Study (CaPOS) of lower socioeconomic status patients.                                                                                                                                                                                                      | Quantitative | Cross-sectional          | Full paper                    | Prostate cancer patients with low socioeconomic status                                | Patients/ Inpoverted populations                 | National/ International       |

| References,<br>alphabetically                 | Aim of the study                                                                                                                                                                                                                                                                        | Methods      |                                                      |                                                    | Participants and context                                                          |                                      |                               |
|-----------------------------------------------|-----------------------------------------------------------------------------------------------------------------------------------------------------------------------------------------------------------------------------------------------------------------------------------------|--------------|------------------------------------------------------|----------------------------------------------------|-----------------------------------------------------------------------------------|--------------------------------------|-------------------------------|
|                                               |                                                                                                                                                                                                                                                                                         | Methods      | Study design                                         | Publication type                                   | Participants                                                                      | Our categorization of the population | Our categorization of context |
| (Kim et al., 2001), USA                       | To evaluate (i) knowledge, level of satisfaction, and treatment preferences and intentions of men newly diagnosed with prostate cancer after participation in a CD-ROM shared decision-making program; and (ii) the relationship between prostate cancer knowledge and health literacy. | Quantitative | Pre-posttest of intervention                         | Full paper                                         | Patients with prostate cancer                                                     | Patients                             | Regional/<br>District         |
| (Kuehnert et al., 2022), USA                  | To establish conceptual consensus for what social determinants of health mean for nursing, with emphasis on health policies that advance planetary health equity and improve planetary health-related quality of life.                                                                  | NA           | NA                                                   | Oriental report.<br>Consensus paper.<br>Full paper | The general population                                                            | General population                   | National/<br>International    |
| (Ladak et al., 2020), Pakistan                | To explore parental perspectives on the influence of socio-cultural factors and environmental resources on the health-related quality of life of children and adolescents after congenital heart disease surgery.                                                                       | Qualitative  | Interviews                                           | Full paper                                         | Children and adolescents who had congenital heart surgery in a low-income country | Patients/ Inpovert populations       | Regional/<br>District         |
| (Lang, 2021), USA                             | To describe self-care management for vulnerable populations.                                                                                                                                                                                                                            | Quantitative | Cross-sectional                                      | Dissertation                                       | Homeless people with diabetes and hypertension                                    | Patients/ Inpovert populations       | Community                     |
| (Langton, 2012), USA                          | To examine two research questions with implications for child health and children's health insurance coverage and a third that may help develop more reliable measurement techniques to aid in future research and practice.                                                            | Multimethod  | Multimethod cross-sectional and longitudinal dataset | Dissertation                                       | Children with cancer and their parents                                            | Patients                             | Community                     |
| (Lowe & Nobriga, 2021), USA                   | To explore the beliefs, access, and motivations of individuals with head and neck cancer living in a rural community in the United States, regarding their speech and swallowing deficits.                                                                                              | Qualitative  | Interviews                                           | Full paper                                         | Individuals with head and neck cancer and their caregivers                        | Patients and caregivers              | Regional/<br>District         |
| (Macabasco-O'Connell et al., 2011), USA       | To examine the relationship between literacy and heart failure-related quality of life, and to explore whether literacy-related differences in knowledge, self-efficacy, and/or self-care behavior explained the relationship.                                                          | Quantitative | Cross-sectional                                      | Full paper                                         | Patients with heart failure                                                       | Patients                             | Regional/<br>District         |
| (Maliski, Connor, Oduro, & Litwin, 2011), USA | To explore links between access to care and quality of life for underserved men with prostate cancer through a literature review.                                                                                                                                                       | Review       | Review                                               | Full paper                                         | Underserved men with prostate cancer                                              | Patients/ Inpovert populations       | National/<br>International    |

| References,<br>alphabetically                         | Aim of the study                                                                                                                                                                                                                                                                                | Methods       |                                                                                               |                                                   | Participants and context                                               |                                      |                               |
|-------------------------------------------------------|-------------------------------------------------------------------------------------------------------------------------------------------------------------------------------------------------------------------------------------------------------------------------------------------------|---------------|-----------------------------------------------------------------------------------------------|---------------------------------------------------|------------------------------------------------------------------------|--------------------------------------|-------------------------------|
|                                                       |                                                                                                                                                                                                                                                                                                 | Methods       | Study design                                                                                  | Publication type                                  | Participants                                                           | Our categorization of the population | Our categorization of context |
| (McDougall et al., 2019), New Mexico                  | To investigate the relationship between socioeconomic characteristics and health-related quality of life in a diverse group of colorectal cancer survivors.                                                                                                                                     | Quantitative  | Cross-sectional                                                                               | Full paper                                        | Colorectal cancer survivors                                            | Patients                             | Regional/<br>District         |
| (Merriman, Ades, & Seffrin, 2002), USA                | To discuss health literacy in the information age.                                                                                                                                                                                                                                              | NA            | NA                                                                                            | Orientational report.<br>Editorial.<br>Full paper | Cancer patients and families in the US with low health literacy skills | Patients                             | National/<br>International    |
| (Meyers et al., 2014), USA                            | To examine how health literacy and other social determinants affect the quality-of-care transitions from hospital to home, as well as subsequent health outcomes including medication use, functional status, health-related quality of life, unplanned health care utilization, and mortality. | Quantitative  | Protocol for prospective cohort                                                               | Full paper                                        | Hospitalized patients with acute coronary disease                      | Patients                             | Community                     |
| (Miller, Cage, Nowacki, Jackson, & Modlin, 2018), USA | To highlight findings of a study conducted with minority men focusing on the association between health literacy and health-related quality of life.                                                                                                                                            | Quantitative  | Cross-sectional                                                                               | Full paper                                        | Minority men                                                           | Immigrants/minorities                | Community                     |
| (Myaskovsky et al., 2011), USA                        | To examine the association of race and cultural factors with quality of life factors (participation, life satisfaction, perceived health status) in people with spinal cord injury.                                                                                                             | Quantitative  | Cross-sectional                                                                               | Full paper                                        | Persons With Spinal Cord Injury                                        | Patients                             | Regional/<br>District         |
| (Omachi, Sarkar, Yelin, Blanc, & Katz, 2011), USA     | To examine the associations between health literacy and both outcomes and health status in COPD.                                                                                                                                                                                                | Quantitative  | Cross-sectional                                                                               | Conference abstract                               | Patients with COPD                                                     | Patients                             | National/<br>International    |
| (Ownby et al., 2017), USA                             | To develop a computer-delivered mobile intervention that will provide individuals with chronic conditions the necessary information to cope with their conditions.                                                                                                                              | Mixed methods | Interview-based development of an intervention and protocol for a randomized controlled trial | Protocol, full paper                              | Individuals with chronic conditions                                    | Patients                             | Community                     |
| (Park et al., 2018), Korea                            | To investigate the effects of medication adherence and health literacy on health-related quality of life and identify factors associated with health-related quality of life in vulnerable older people with hypertension.                                                                      | Quantitative  | Cross-sectional                                                                               | Full paper                                        | Low-income older people with hypertension in South Korea               | Patients/ Inpoverted populations     | Community                     |

| References,<br>alphabetically               | Aim of the study                                                                                                                                                                                                                                                                                                                                                                           | Methods      |                    |                                                      | Participants and context                                      |                                      |                               |
|---------------------------------------------|--------------------------------------------------------------------------------------------------------------------------------------------------------------------------------------------------------------------------------------------------------------------------------------------------------------------------------------------------------------------------------------------|--------------|--------------------|------------------------------------------------------|---------------------------------------------------------------|--------------------------------------|-------------------------------|
|                                             |                                                                                                                                                                                                                                                                                                                                                                                            | Methods      | Study design       | Publication type                                     | Participants                                                  | Our categorization of the population | Our categorization of context |
| (Prihanto et al., 2021), Indonesia          | To assess the effect of health literacy on the QoL among Indonesian undergraduate university students when socioeconomic considerations are taken into account                                                                                                                                                                                                                             | Quantitative | Cross-sectional    | Full paper                                           | University students in Indonesia                              | Other                                | Community                     |
| (Rak, 2012), USA                            | To investigate the prevalence of low health literacy in individuals with diabetes, and to examine associations between health literacy and certain domains of quality of life.                                                                                                                                                                                                             | Quantitative | Cross-sectional    | Dissertation                                         | Persons with diabetes in Michigan                             | Patients                             | Regional/<br>District         |
| (Reid et al., 2021), USA                    | To determine the prevalence of limited health literacy and to explore the relationship between adolescents' health literacy status and energy balance related behaviors, including nutrition, physical activity, sedentary activity, and sleep, with the secondary objectives being to explore how health literacy is related to BMI and school related quality of life among adolescents. | Quantitative | Cross-sectional    | Full paper                                           | Rural Appalachian middle school students in Virginia          | Other                                | Community                     |
| (Rijken & van der Heide, 2019), Netherlands | To examine whether subgroups of people with multimorbidity could be distinguished based on their needs, and profiled these subgroups according to medical complexity and the availability of personal resources.                                                                                                                                                                           | Quantitative | Cross-sectional    | Full paper                                           | People with multimorbidity                                    | Patients                             | Community                     |
| (Roberto et al., 2018), Brazil              | To investigate factors associated with the lack of access to information on oral health among adults [Portuguese].                                                                                                                                                                                                                                                                         | Quantitative | Cross-sectional    | Full paper                                           | Individuals from rural and urban areas                        | Other                                | Community                     |
| (Rozier, 2012), USA                         | To review some oral health initiatives and their outcomes with a focus on youth.                                                                                                                                                                                                                                                                                                           | NA           | NA                 | Orientational report.<br>Issue brief.<br>Full paper. | Young dental patients in North Carolina                       | Patients                             | National/<br>International    |
| (Schaffler et al., 2018), Canada/<br>review | To review self-management interventions in populations with low income or low health literacy and synthesize the efficacy of these interventions.                                                                                                                                                                                                                                          | Review       | Systematic review  | Full paper                                           | Low-income or low-health literacy people with chronic illness | Patients/ Inpovert populations       | National/<br>International    |
| (Scheuer, 2018), Denmark                    | To examine whether the Danish Cancer Society's nation-wide Patient Navigation Project improves quality of life and health literacy among socially vulnerable cancer patients.                                                                                                                                                                                                              | Quantitative | Pre-test post-test | Conference abstract                                  | Socially vulnerable cancer patients                           | Patients/ Inpovert populations       | Community                     |

| References, alphabetically                                                 | Aim of the study                                                                                                                                                                                                                                                                                                                                                                                                                                             | Methods      |                                   |                                | Participants and context                                                             |                                      |                               |
|----------------------------------------------------------------------------|--------------------------------------------------------------------------------------------------------------------------------------------------------------------------------------------------------------------------------------------------------------------------------------------------------------------------------------------------------------------------------------------------------------------------------------------------------------|--------------|-----------------------------------|--------------------------------|--------------------------------------------------------------------------------------|--------------------------------------|-------------------------------|
|                                                                            |                                                                                                                                                                                                                                                                                                                                                                                                                                                              | Methods      | Study design                      | Publication type               | Participants                                                                         | Our categorization of the population | Our categorization of context |
| (Simon, Li, & Dong, 2014), USA                                             | To examine health literacy level among community-dwelling Chinese older adults in the greater Chicago area, and examine the sociodemographic, family position, and health-related correlates of health literacy among this population.                                                                                                                                                                                                                       | Quantitative | Cohort                            | Full paper                     | Older adult Chinese in the greater Chicago area                                      | Immigrants/minorities                | Community                     |
| (Stormacq, Wosinski, Boillat, & Den Broucke, 2020), Europe and USA, review | To identify and synthesize the best available evidence on the effectiveness on health-related outcomes of health literacy interventions for enabling socioeconomically disadvantaged people living in the community to access, understand, appraise and apply health information; and ii) to identify components of health literacy interventions associated with improved health-related outcomes.                                                          | Review       | Systematic review                 | Review, systematic, full paper | Socially or socioeconomically disadvantaged adults                                   | Inpoverted populations               | Community                     |
| (Talmage, Figueroa, & Wolfersteig, 2018), USA                              | To describe the connections between social determinants and quality of life as elucidated from a large-scale community health needs assessment conducted in Maricopa County, Arizona.                                                                                                                                                                                                                                                                        | Qualitative  | Focus groups                      | Full paper                     | The general population of Maricopa County in Arizona                                 | General population                   | Community                     |
| (Tan et al., 2019), Italia, Netherlands, Spain, France, UK                 | To evaluate the benefits of offering the chronic disease self-management program intervention to the target population.                                                                                                                                                                                                                                                                                                                                      | Quantitative | Protocol for intervention         | Protocol, full paper           | Adults with a chronic condition and their caregivers in a low socioeconomic position | Patients                             | Community                     |
| (Todorovic et al., 2019), Bosnia                                           | To assess health literacy and its association with sociodemographic variables, self-perception of health and the presence of chronic conditions in primary healthcare setting.                                                                                                                                                                                                                                                                               | Quantitative | Cross-sectional                   | Full paper                     | Patients with a family physician in primary health care settings                     | Patients                             | Community                     |
| (Uddin, Bhar, Al Mahmud, & Islam, 2017), Bangladesh                        | To report the awareness, knowledge, attitudes, and practice of mental disorders; estimate the prevalence of and risk factors for psychological distress; measure association of psychological distress and other sociodemographic factors with quality of life and test the feasibility to use Kessler 10-item (K10) and WHO Quality of Life-BREF (WHOQOL-BREF) questionnaires in rural Bangladesh for measuring psychological distress and quality of life. | Quantitative | Protocol for a prospective cohort | Full paper                     | Adults and older adults in the rural Bangladesh population                           | Inpoverted populations               | Community                     |



| References, alphabetically                                    | Aim of the study                                                                                                                                                                                                                                                                                                                                                                                                                                        | Methods      |                                             |                        | Participants and context                                                                                   |                                      |                               |
|---------------------------------------------------------------|---------------------------------------------------------------------------------------------------------------------------------------------------------------------------------------------------------------------------------------------------------------------------------------------------------------------------------------------------------------------------------------------------------------------------------------------------------|--------------|---------------------------------------------|------------------------|------------------------------------------------------------------------------------------------------------|--------------------------------------|-------------------------------|
|                                                               |                                                                                                                                                                                                                                                                                                                                                                                                                                                         | Methods      | Study design                                | Publication type       | Participants                                                                                               | Our categorization of the population | Our categorization of context |
| (Virlée, van Riel, & Hammedi, 2020), Belgium                  | To develop a better understanding of how online health community members with different health literacy levels benefit from their participation, through the analysis and comparison of their resource integration processes.                                                                                                                                                                                                                           | Multimethod  | Multimethod (cross-sectional and interview) | Full paper             | Online health community participants                                                                       | Other                                | Community                     |
| (Walker, Gebregziabher, Martin-Harris, & Egede, 2014), USA    | To investigate the independent effects of socioeconomic and psychological social determinants of health on diabetes knowledge, self-care, diabetes outcomes and quality of life.                                                                                                                                                                                                                                                                        | Quantitative | Cross-sectional                             | Full paper             | Adults with type 2 diabetes                                                                                | Patients                             | Community                     |
| (Wang et al., 2013), China                                    | To examine the relationship between health literacy and health-related quality of life as well as relationship differentials by ethnicity among rural women from a Chinese poor minority area.                                                                                                                                                                                                                                                          | Quantitative | Cross-sectional                             | Full paper             | Vulnerable minority women aged 23-57 in rural China                                                        | Immigrants/minorities                | Community                     |
| (Wang, Kane, Xu, & Meng, 2015), China                         | To examine how health literacy might modify the association between chronic disease and their health-related quality of life impacts.                                                                                                                                                                                                                                                                                                                   | Quantitative | Cross-sectional                             | Full paper             | Vulnerable minority women aged 23-57 in rural China                                                        | Inpoverted populations               | Community                     |
| (Washington, Curtis, Waite, Wolf, & Paasche-Orlow, 2018), USA | To characterize the longitudinal effect of race/ethnicity on childhood asthma outcomes, and to what extent caregiver health literacy, education level, and asthma knowledge mediate these associations.                                                                                                                                                                                                                                                 | Quantitative | Cross-sectional cohort                      | Full paper             | Children with asthma and their families in Chicago                                                         | Patients                             | Community                     |
| (Webb, 2020), USA                                             | To understand the impact of social determinants of health on a chronically transfused population with sickle cell disease, as well as available screening tools. Recognize the role of health literacy in complex medical decision-making and universal communication strategies to improve comprehension in patients of all health literacy levels. Identify health-related quality of life measures that are affected by chronic transfusion therapy. | Case study   | Case study                                  | Case study, full paper | Patients receiving chronic transfusion therapy, case study of a 2-year-old with sickle-cell and her mother | Patients                             | Regional/District             |
| (White, Hall, & Johnson, 2014), USA                           | To understand community beliefs and knowledge of environmental health risks, determine community levels of trust in federal/local agencies and community groups, and identify strategies for mobilizing residents using environmental health messages and environmental health education programs.                                                                                                                                                      | Qualitative  | Focus groups                                | Full paper             | People in communities with associated poverty                                                              | Inpoverted populations               | Community                     |

| References,<br>alphabetically                         | Aim of the study                                                                                                                                                                                                                            | Methods      |                        |                  | Participants and context                   |                                      |                               |
|-------------------------------------------------------|---------------------------------------------------------------------------------------------------------------------------------------------------------------------------------------------------------------------------------------------|--------------|------------------------|------------------|--------------------------------------------|--------------------------------------|-------------------------------|
|                                                       |                                                                                                                                                                                                                                             | Methods      | Study design           | Publication type | Participants                               | Our categorization of the population | Our categorization of context |
| (Wong Min et al., 2022), Malaysia                     | To investigate factors associated with depression and anxiety symptoms and quality of life among Malaysia's multiethnic urban lower-income communities.                                                                                     | Quantitative | Cross-sectional survey | Full paper       | Low-income dwellers in Malaysia            | Inpoverted populations               | Community                     |
| (Xiao, Lee, & Liu, 2020), USA                         | To examine the interrelationships among demographics, health literacy, self-perceived health status, and quality of life using structural equation modeling.                                                                                | Quantitative | Cross-sectional        | Full paper       | Korean and Vietnamese immigrants in the US | Immigrants/minorities                | Community                     |
| (Xu, Zhou, Wong, & Wang, 2021), China                 | To assess the relationship between patients' eHealth literacy and their socioeconomic determinants and to investigate the association between patients' eHealth literacy and their satisfaction with shared decision-making and well-being. | Quantitative | Cross-sectional        | Full paper       | Patients in general in China               | Patients                             | Regional / District           |
| (Aaby, Friis, Christensen, & Maingdal, 2020), Denmark | To examine the associations between health literacy and participation in cardiac rehabilitation and health literacy and health-related quality of life.                                                                                     | Quantitative | Cross-sectional        | Full paper       | adult cardiac rehabilitation patients      | Patients                             | Community                     |

### Full citations of the included reports

- Albus, C. (2018). Health literacy: Is it important for cardiovascular disease prevention? *European Journal of Preventive Cardiology*, 25(9), 934-935.  
doi:<http://dx.doi.org/10.1177/2047487318770519>
- Alruthia, Y., Sales, I., Almalag, H., Alwhaibi, M., Almosabhi, L., Albassam, A. A., . . . Asiri, Y. (2020). The relationship between health-related quality of life and trust in primary care physicians among patients with diabetes. *Clinical Epidemiology*, 12, 143-151. doi:<http://dx.doi.org/10.2147/CLEP.S236952>
- Amoah, P. A., & Phillips, D. R. (2018). Health literacy and health: rethinking the strategies for universal health coverage in Ghana. *Public health*, 159, 40-49.  
doi:<https://dx.doi.org/10.1016/j.puhe.2018.03.002>
- An, J. Y., Moon, H., & Cha, S. (2019). Health literacy, depression, and stress among Chinese immigrants in South Korea. *Public Health Nursing*, 36(5), 603-614.  
doi:<https://dx.doi.org/10.1111/phn.12632>
- Angner, E., Miller, M. J., Ray, M. N., Saag, K. G., & Allison, J. J. (2010). Health literacy and happiness: A community-based study. *Social Indicators Research*, 95(2), 325-338.  
doi:<https://dx.doi.org/10.1007/s11205-009-9462-5>
- Apter, A. J., Bryant, S., Morales, K. H., Wan, F., Hardy, S., Reed-Wells, S., . . . Localio, R. (2015). Using IT to improve access, communication, and asthma in African American and Hispanic/Latino Adults: Rationale, design, and methods of a randomized controlled trial. *Contemporary Clinical Trials*, 44, 119-128.  
doi:<http://dx.doi.org/10.1016/j.cct.2015.08.001>

- Apter, A. J., Morales, K. H., Han, X., Perez, L., Huang, J., Ndicu, G., . . . Schwartz, J. S. (2017). A patient advocate to facilitate access and improve communication, care, and outcomes in adults with moderate or severe asthma: Rationale, design, and methods of a randomized controlled trial. *Contemporary Clinical Trials*, 56, 34-45. doi:<https://dx.doi.org/10.1016/j.cct.2017.03.004>
- Asare, M., McIntosh, S., Culakova, E., Alio, A., Umstattd Meyer, M. R., Kleckner, A. S., . . . Kamen, C. S. (2019). Assessing Physical Activity Behavior of Cancer Survivors by Race and Social Determinants of Health. *International Quarterly of Community Health Education*, 40(1), 7-16. doi:10.1177/0272684X19857427
- Batista, M. J., Lawrence, H. P., & Sousa, M. (2017). Oral health literacy and oral health outcomes in an adult population in Brazil. *BMC Public Health*, 18(1), 60. doi:<https://dx.doi.org/10.1186/s12889-017-4443-0>
- Blancafort Alias, S., Monteserin Nadal, R., Moral, I., Roque Figols, M., Rojano, I. L. X., & Coll-Planas, L. (2021). Promoting social capital, self-management and health literacy in older adults through a group-based intervention delivered in low-income urban areas: results of the randomized trial AEQUALIS. *BMC Public Health*, 21(1), 84. doi:<https://dx.doi.org/10.1186/s12889-020-10094-9>
- Bragard, I., Coucke, P. A., Petre, B., Etienne, A. M., & Guillaume, M. (2017). [Health literacy, a way to reduce social health inequalities]. *Revue Medicale de Liege*, 72(1), 32-36. Retrieved from <https://ovidsp.ovid.com/ovidweb.cgi?T=JS&CSC=Y&NEWS=N&PAGE=fulltext&D=med14&AN=28387075>
- Clarke, H., & Voss, M. (2016). The role of a multidisciplinary student team in the community management of chronic obstructive pulmonary disease. *Primary Health Care Research & Development*, 17(4), 415-420. doi:<https://dx.doi.org/10.1017/S1463423616000013>
- Curtis, L. M., Wolf, M. S., Weiss, K. B., & Grammer, L. C. (2012). The impact of health literacy and socioeconomic status on asthma disparities. *Journal of Asthma*, 49(2), 178-183. doi:<https://dx.doi.org/10.3109/02770903.2011.648297>
- de Vries, E., Buitrago, G., Quitian, H., Wiesner, C., & Castillo, J. S. (2018). Access to cancer care in Colombia, a middle-income country with universal health coverage. *Journal of Cancer Policy, Part B*, 15, 104-112. doi:<http://dx.doi.org/10.1016/j.jcpo.2018.01.003>
- Durand, M. A., Yen, R. W., O'Malley, A. J., Schubbe, D., Politi, M. C., Saunders, C. H., . . . Elwyn, G. (2021). What matters most: Randomized controlled trial of breast cancer surgery conversation aids across socioeconomic strata. *Cancer*, 127(3), 422-436. doi:10.1002/cncr.33248
- Ernsting, C., Dombrowski, S. U., Oedekoven, M., J.L. O. S., Kanzler, M., Kuhlmeier, A., & Gellert, P. (2017). Using Smartphones and Health Apps to Change and Manage Health Behaviors: A Population-Based Survey. *Journal of medical Internet research*, 19(4), e101. doi:<http://dx.doi.org/10.2196/jmir.6838>
- Faruqi, N., Stocks, N., Spooner, C., el Haddad, N., & Harris, M. F. (2015). Research protocol: Management of obesity in patients with low health literacy in primary health care. *BMC Obesity*, 2(1) (no pagination). doi:<http://dx.doi.org/10.1186/s40608-015-0036-6>
- Fung, C. S. C., Yu, E. Y. T., Guo, V. Y., Wong, C. K. H., Kung, K., Ho, S. Y., . . . Lam, C. L. K. (2016). Development of a Health Empowerment Programme to improve the health of working poor families: Protocol for a prospective cohort study in Hong Kong. *BMJ Open*, 6(2) (no pagination). doi:<http://dx.doi.org/10.1136/bmjopen-2015-010015>
- Ghisi, G. L. D. M., Chaves, G. S. D. S., Britto, R. R., & Oh, P. (2018). Health literacy and coronary artery disease: A systematic review. *Patient education and counseling*, 101(2), 177-184. doi:<http://dx.doi.org/10.1016/j.pec.2017.09.002>
- Gibbs, J. F., Guarnieri, E., Chu, Q. D., Murdoch, K., & Asif, A. (2021). Value-based chronic care model approach for vulnerable older patients with multiple chronic conditions. *Journal of Gastrointestinal Oncology*, 12(Suppl 2), S324-S338. doi:<https://dx.doi.org/10.21037/jgo-20-317>
- Goss, H. R., McDermott, C., Hickey, L., Issartel, J., Meegan, S., Morrissey, J., . . . Belton, S. (2021). Understanding disadvantaged adolescents' perception of health literacy through a systematic development of peer vignettes. *BMC Public Health*, 21(1), 1-11. doi:10.1186/s12889-021-10634-x
- Graham, L. A., Hawn, M. T., Dasinger, E. A., Baker, S. J., Oriel, B. S., Wahl, T. S., . . . Morris, M. S. (2021). Psychosocial Determinants of Readmission after Surgery. *Medical care*, 59(10), 864-871. doi:<http://dx.doi.org/10.1097/MLR.0000000000001600>
- Griech, S. F., & Skrzat, J. M. (2020). Roles for Physical Therapists to Address Health Literacy as a Social Determinant of Cardiovascular Disease: A Clinical Perspective. *Cardiopulmonary Physical Therapy Journal*, 31(1), 29-34. doi:<http://dx.doi.org/10.1097/CPT.0000000000000132>

- Guhl, E., Althouse, A., Sharbaugh, M., Pusateri, A. M., Paasche-Orlow, M., & Magnani, J. W. (2019). Association of income and health-related quality of life in atrial fibrillation. *Open Heart*, 6(1) (no pagination). doi:http://dx.doi.org/10.1136/openhrt-2018-000974
- Hardgraves, V. M., Henry, L. J., & Patton, S. K. (2021). "I'm Gonna Hang on to These As Long As I Can": Examining the Perspectives and Knowledge of Oral Health Issues of Older Adults Living Independently. *American Journal of Lifestyle Medicine*. doi:10.1177/155982762111026842
- Harsch, S., Jawid, A., Jawid, M. E., Saboga Nunes, L., Sahrai, D., & Bittlingmayer, U. H. (2021). The relationship of health literacy, wellbeing and religious beliefs in neglected and unequal contexts-Results of a survey study in central Afghanistan. *Health Promotion Journal of Australia*, 32 Suppl 1, 80-87. doi:https://dx.doi.org/10.1002/hpja.419
- Hickey, K. T., Masterson Creber, R. M., Reading, M., Sciacca, R. R., Riga, T. C., Frulla, A. P., & Casida, J. M. (2018). Low health literacy: Implications for managing cardiac patients in practice. *Nurse Practitioner*, 43(8), 49-55. doi:https://dx.doi.org/10.1097/01.NPR.0000541468.54290.49
- Irwin, K. (2018). Improving cancer care for underserved communities in northeastern Massachusetts: Serious mental illness and cancer. *Psycho-Oncology*, 27(Supplement 1), 37-38. doi:http://dx.doi.org/10.1002/pon.4622
- Jamieson, L. M., Divaris, K., Parker, E. J., & Lee, J. Y. (2013). Oral health literacy comparisons between Indigenous Australians and American Indians. *Community Dental Health*, 30(1), 52-57. Retrieved from https://ovidsp.ovid.com/ovidweb.cgi?T=JS&CSC=Y&NEWS=N&PAGE=fulltext&D=med10&AN=23550508
- Johnson, D. R., McDermott, R. A., Clifton, P. M., D'Onise, K., Taylor, S. M., Preece, C. L., & Schmidt, B. A. (2015). Characteristics of Indigenous adults with poorly controlled diabetes in north Queensland: implications for services. *BMC Public Health*, 15, 325. doi:https://dx.doi.org/10.1186/s12889-015-1660-2
- Katzmarzyk, P. T., Martin, C. K., Newton, R. L., Jr., Apolzan, J. W., Arnold, C. L., Davis, T. C., . . . Springgate, B. (2018). Promoting Successful Weight Loss in Primary Care in Louisiana (PROPEL): Rationale, design and baseline characteristics. *Contemporary Clinical Trials*, 67, 1-10. doi:https://dx.doi.org/10.1016/j.cct.2018.02.002
- Kim, S. P., Bennett, C. L., Chan, C., Chmiel, J., Falcone, D., Knight, S. J., . . . Smith, J. S. (1999). QOL and outcomes research in prostate cancer patients with low socioeconomic status. *Oncology (Williston Park)*, 13(6), 823-832; discussion 835. Retrieved from https://ovidsp.ovid.com/ovidweb.cgi?T=JS&CSC=Y&NEWS=N&PAGE=fulltext&D=med4&AN=10378220
- Kim, S. P., Knight, S. J., Tomori, C., Colella, K. M., Schoor, R. A., Shih, L., . . . Bennett, C. L. (2001). Health literacy and shared decision making for prostate cancer patients with low socioeconomic status. *Cancer Investigation*, 19(7), 684-691. Retrieved from https://ovidsp.ovid.com/ovidweb.cgi?T=JS&CSC=Y&NEWS=N&PAGE=fulltext&D=med4&AN=11577809
- Kuehnert, P., Fawcett, J., DePriest, K., Chinn, P., Cousin, L., Ervin, N., . . . Waite, R. (2022). Defining the social determinants of health for nursing action to achieve health equity: A consensus paper from the American Academy of Nursing. *Nursing Outlook*, 70(1), 10-27. doi:10.1016/j.outlook.2021.08.003
- Ladak, L. A., Gallagher, R., Hasan, B. S., Awais, K., Abdullah, A., & Gullick, J. (2020). Exploring the influence of socio-cultural factors and environmental resources on the health related quality of life of children and adolescents after congenital heart disease surgery: parental perspectives from a low middle income country. *Journal of Patientreported Outcomes*, 4(1), 72. doi:https://dx.doi.org/10.1186/s41687-020-00239-0
- Lang, L. P. (2021). Self-care management in homeless adults with hypertension. *Dissertation Abstracts International: Section B: The Sciences and Engineering*, 82(4-B), No-Specified. Retrieved from http://ovidsp.ovid.com/ovidweb.cgi?T=JS&PAGE=reference&D=psyc18&NEWS=N&AN=2020-86254-166
- Langton, C. E. (2012). Pathways to increasing child health: Implications for policy, research, and practice. *Dissertation Abstracts International Section A: Humanities and Social Sciences*, 73(3-A), 1197. Retrieved from http://ovidsp.ovid.com/ovidweb.cgi?T=JS&PAGE=reference&D=psyc9&NEWS=N&AN=2012-99170-597
- Lowe, S. M., & Nobriga, C. V. (2021). Head and Neck Cancer in a Rural U.S. Population: Quality of Life, Coping, Health Care Literacy, and Access to Services. *American journal of speech-language pathology*, 30(3), 1116-1133. doi:http://dx.doi.org/10.1044/2021\_AJSLP-20-00223
- Macabasco-O'Connell, A., DeWalt, D. A., Broucksou, K. A., Hawk, V., Baker, D. W., Schillinger, D., . . . Pignone, M. (2011). Relationship between literacy, knowledge, self-care behaviors, and heart failure-related quality of life among patients with heart failure. *Journal of general internal medicine*, 26(9), 979-986. doi:https://dx.doi.org/10.1007/s11606-011-1668-y

- Maliski, S. L., Connor, S. E., Oduro, C., & Litwin, M. S. (2011). Access to health care and quality of life for underserved men with prostate cancer. *Seminars in Oncology Nursing*, 27(4), 267-277. doi:<https://dx.doi.org/10.1016/j.soncn.2011.07.005>
- McDougall, J. A., Blair, C. K., Wiggins, C. L., Goodwin, M. B., Chiu, V. K., Rajput, A., & Kinney, A. Y. (2019). Socioeconomic disparities in health-related quality of life among colorectal cancer survivors. *Journal of Cancer Survivorship*, 13(3), 459-467. doi:<https://dx.doi.org/10.1007/s11764-019-00767-9>
- Merriman, B., Ades, T., & Seffrin, J. R. (2002). Health literacy in the information age: Communicating cancer information to patients and families. *Electroanalysis*, 52(3), 130-133. doi:10.3322/canjclin.52.3.130
- Meyers, A. G., Salanitro, A., Wallston, K. A., Cawthon, C., Vasilevskis, E. E., Goggins, K. M., . . . Kripalani, S. (2014). Determinants of health after hospital discharge: rationale and design of the Vanderbilt Inpatient Cohort Study (VICS). *BMC health services research*, 14, 10. doi:<https://dx.doi.org/10.1186/1472-6963-14-10>
- Miller, D. B., Cage, J. L., Nowacki, A. S., Jackson, B., & Modlin, C. S. (2018). Health Literacy (HL) & Health-Related Quality of Life (HRQL) Among Minority Men. *Journal of the National Medical Association*, 110(2), 124-129. doi:10.1016/j.jnma.2017.10.001
- Myaskovsky, L., Burkitt, K. H., Lichy, A. M., Ljungberg, I. H., Fyffe, D. C., Ozawa, H., . . . Boninger, M. L. (2011). The association of race, cultural factors, and health-related quality of life in persons with spinal cord injury. *Archives of Physical Medicine & Rehabilitation*, 92(3), 441-448. doi:<https://dx.doi.org/10.1016/j.apmr.2010.10.007>
- Omachi, T. A., Sarkar, U., Yelin, E. H., Blanc, P. D., & Katz, P. P. (2011). Lower health literacy among COPD patients is associated with poorer COPD functional outcomes and greater risk of COPD-related emergency utilization. *American Journal of Respiratory and Critical Care Medicine. Conference: American Thoracic Society International Conference, ATS, 183(1 MeetingAbstracts)*. Retrieved from [http://ajrccm.atsjournals.org/cgi/reprint/183/1\\_MeetingAbstracts/A2257?sid=9116dfaa-e902-4661-98c2-9c7166e44bd8](http://ajrccm.atsjournals.org/cgi/reprint/183/1_MeetingAbstracts/A2257?sid=9116dfaa-e902-4661-98c2-9c7166e44bd8)
- Ownby, R. L., Acevedo, A., Waldrop-Valverde, D., Caballero, J., Simonson, M., Davenport, R., . . . Jacobs, R. J. (2017). A Mobile App for Chronic Disease Self-Management: Protocol for a Randomized Controlled Trial. *JMIR research protocols*, 6(4), e53. doi:<https://dx.doi.org/10.2196/resprot.7272>
- Park, N. H., Song, M. S., Shin, S. Y., Jeong, J.-h., Lee, H. Y., & Bardage, B.-L. B. (2018). The effects of medication adherence and health literacy on health-related quality of life in older people with hypertension. *International Journal of Older People Nursing*, 13(3), 1-10. doi:<https://dx.doi.org/10.1111/opn.12196>
- Prihanto, J. B., Wahjuni, E. S., Nurhayati, F., Matsuyama, R., Tsunematsu, M., & Kakehashi, M. (2021). Health Literacy, Health Behaviors, and Body Mass Index Impacts on Quality of Life: Cross-Sectional Study of University Students in Surabaya, Indonesia. *International Journal of Environmental Research & Public Health [Electronic Resource]*, 18(24), 13. doi:<https://dx.doi.org/10.3390/ijerph182413132>
- Rak, E. C. (2012). Quality of life of persons with diabetes: Understanding the effects of health literacy, self-efficacy and knowledge of chronic illness and disability. *Dissertation Abstracts International: Section B: The Sciences and Engineering*, 73(4-B), 2535. Retrieved from <http://ovidsp.ovid.com/ovidweb.cgi?T=JS&PAGE=reference&D=psyc9&NEWS=N&AN=2012-99200-098>
- Reid, A. L., Porter, K. J., You, W., Kirkpatrick, B. M., Yuhas, M., Vaught, S. S., & Zoellner, J. M. (2021). Low Health Literacy Is Associated With Energy-Balance-Related Behaviors, Quality of Life, and BMI Among Rural Appalachian Middle School Students: A Cross-Sectional Study. *The Journal of school health*, 91(8), 608-616. doi:<http://dx.doi.org/10.1111/josh.13051>
- Rijken, M., & van der Heide, I. (2019). Identifying subgroups of persons with multimorbidity based on their needs for care and support. *BMC family practice*, 20(1), 179. doi:<https://dx.doi.org/10.1186/s12875-019-1069-6>
- Roberto, L. L., Noronha, D. D., Souza, T. O., Miranda, E. J. P., Martins, A. M. E. B. L., Paula, A. M. B., . . . Haikal, D. S. (2018). Lack of access to information on oral health problems among adults: an approach based on the theoretical model for literacy in health. [Portuguese]. *Ciencia & Saude Coletiva*, 23(3), 823-835. doi:<http://dx.doi.org/10.1590/1413-81232018233.25472015>
- Rozier, R. G. (2012). Oral health in North Carolina: innovations, opportunities, and challenges. *North Carolina Medical Journal*, 73(2), 100-107. Retrieved from <https://ovidsp.ovid.com/ovidweb.cgi?T=JS&CSC=Y&NEWS=N&PAGE=fulltext&D=med9&AN=22860318>

- Schaffler, J., Leung, K., Tremblay, S., Merdsoy, L., Lambert, S. D., Belzile, E., & Lambrou, A. (2018). The Effectiveness of Self-Management Interventions for Individuals with Low Health Literacy and/or Low Income: A Descriptive Systematic Review. *JGIM: Journal of General Internal Medicine*, 33(4), 510-523. doi:10.1007/s11606-017-4265-x
- Scheuer, S. (2018). The patient navigation project for socially vulnerable cancer patients improves quality of life and health literacy. *Journal of Global Oncology*, 4(Supplement 2), 110s. doi:http://dx.doi.org/10.1200/jgo.18.21300
- Simon, M. A., Li, Y., & Dong, X. (2014). Levels of health literacy in a community-dwelling population of Chinese older adults. *Journals of Gerontology Series A-Biological Sciences & Medical Sciences*, 69 Suppl 2, S54-60. doi:https://dx.doi.org/10.1093/gerona/glu179
- Stormacq, C., Wosinski, J., Boillat, E., & Den Broucke, S. V. (2020). Effects of health literacy interventions on health-related outcomes in socioeconomically disadvantaged adults living in the community: A systematic review. *JBISIRIR-D-18-00023*. doi:https://dx.doi.org/10.11124/JBISIRIR-D-18-00023
- Talmage, C. A., Figueroa, H. L., & Wolfersteig, W. L. (2018). CULTIVATING A CULTURE OF HEALTH IN THE SOUTHWEST: LINKING ACCESS AND SOCIAL DETERMINANTS TO QUALITY OF LIFE AMONGST DIVERSE COMMUNITIES. *Journal of Health and Human Services Administration*, 40(4), 397-432. Retrieved from https://www.scopus.com/inward/record.uri?eid=2-s2.0-85049038194&partnerID=40&md5=9b94d71623c53dda0b9d50ff3f05158e
- Tan, S. S., Pisano, M. M., Boone, A. L. D., Baker, G., Pers, Y. M., Pilotto, A., . . . Effichronic, C. (2019). Evaluation Design of EFFICHRONIC: The Chronic Disease Self-Management Programme (CDSMP) Intervention for Citizens with a Low Socioeconomic Position. *International journal of environmental research and public health*, 16(11). doi:10.3390/ijerph16111883
- Todorovic, N., Jovic-Vranes, A., Djikanovic, B., Pilipovic-Broceta, N., Vasiljevic, N., Lucic-Samardzija, V., & Peric, A. (2019). Assessment of health literacy in the adult population registered to family medicine physicians in the Republic of Srpska, Bosnia and Herzegovina. *European Journal of General Practice*, 25(1), 32-38. doi:10.1080/13814788.2019.1571579
- Uddin, M. N., Bhar, S., Al Mahmud, A., & Islam, F. M. A. (2017). Psychological distress and quality of life: rationale and protocol of a prospective cohort study in a rural district in Bangladesh. *BMJ Open*, 7(9), e016745. doi:https://dx.doi.org/10.1136/bmjopen-2017-016745
- Virlée, J., van Riel, A. C. R., & Hammedi, W. (2020). Health literacy and its effects on well-being: how vulnerable healthcare service users integrate online resources. *Journal of Services Marketing*, 34(5), 697-715. doi:10.1108/JSM-02-2019-0057
- Walker, R. J., Gebregziabher, M., Martin-Harris, B., & Egede, L. E. (2014). Independent effects of socioeconomic and psychological social determinants of health on self-care and outcomes in Type 2 diabetes. *General Hospital Psychiatry*, 36(6), 662-668. doi:https://dx.doi.org/10.1016/j.genhosppsych.2014.06.011
- Wang, C., Kane, R. L., Xu, D., & Meng, Q. (2015). Health literacy as a moderator of health-related quality of life responses to chronic disease among Chinese rural women. *BMC Women's Health*, 15, 34. doi:https://dx.doi.org/10.1186/s12905-015-0190-5
- Wang, C., Li, H., Li, L., Xu, D., Kane, R. L., & Meng, Q. (2013). Health literacy and ethnic disparities in health-related quality of life among rural women: results from a Chinese poor minority area. *Health & Quality of Life Outcomes*, 11, 153. doi:https://dx.doi.org/10.1186/1477-7525-11-153
- Washington, D. M., Curtis, L. M., Waite, K., Wolf, M. S., & Paasche-Orlow, M. K. (2018). Sociodemographic Factors Mediate Race and Ethnicity-associated Childhood Asthma Health Disparities: a Longitudinal Analysis. *Journal of Racial & Ethnic Health Disparities*, 5(5), 928-938. doi:https://dx.doi.org/10.1007/s40615-017-0441-2
- Webb, J. (2020). Social aspects of chronic transfusions: addressing social determinants of health, health literacy, and quality of life. *Hematology*, 2020(1), 175-183. doi:https://dx.doi.org/10.1182/hematology.2020000104
- White, B. M., Hall, E. S., & Johnson, C. (2014). Environmental health literacy in support of social action: an environmental justice perspective. *Journal of Environmental Health*, 77(1), 24-29. Retrieved from https://ovidsp.ovid.com/ovidweb.cgi?T=JS&CSC=Y&NEWS=N&PAGE=fulltext&D=med11&AN=25185324
- Wong Min, F., Hazreen Abdul, M., Rozmi, I., Tin Tin, S., Tan Maw, P., & Mas Ayu, S. (2022). Psychosocial factors associated with mental health and quality of life during the COVID-19 pandemic among low-income urban dwellers in Peninsular Malaysia. *medRxiv*. doi:10.1101/2022.02.21.22271310

- Xiao, Z., Lee, J., & Liu, W. (2020). Korean and Vietnamese immigrants are not the same: Health literacy, health status, and quality of life. *Journal of Human Behavior in the Social Environment*, 30(6), 711-729. doi:10.1080/10911359.2020.1740852
- Xu, R. H., Zhou, L. M., Wong, E. L. Y., & Wang, D. (2021). The association between patients' ehealth literacy and satisfaction with shared decision-making and well-being: Multicenter cross-sectional study. *Journal of medical Internet research*, 23(9) (no pagination). doi:http://dx.doi.org/10.2196/26721
- Aaby, A., Friis, K., Christensen, B., & Maindal, H. T. (2020). Health Literacy among People in Cardiac Rehabilitation: Associations with Participation and Health-Related Quality of Life in the Heart Skills Study in Denmark. *International Journal of Environmental Research & Public Health [Electronic Resource]*, 17(2), 09. doi:https://dx.doi.org/10.3390/ijerph17020443
